# Supplementary material for: Symbiotic responses of Lotus japonicus to two isogenic lines of a mycorrhizal fungus differing in the presence/absence of an endobacterium
Source: PubMed Central journal article supplement (PMC9300078; doi:10.1111/tpj.15578), 2021-12-06
Supplement: TPJ-108-1547-s007.pdf [file TPJ-108-1547-s007.pdf]

*Lotus japonicus* differentially responds to two isogenic lines of a mycorrhizal fungus only differing for the presence/absence of an endobacterium

Francesco Venice, Matteo Chialva, Guido Domingo, Mara Novero, Andrea Carpentieri, Alessandra Salvioli di Fossalunga, Stefano Ghignone, Angela Amoresano, Candida Vannini, Luisa Lanfranco, Paola Bonfante

## Supporting Information

### Supporting Figures

**Figure S1.** Ultrastructure of arbusculated cortical cells of *Lotus japonicus* roots when colonized by the AM fungus *Gigaspora margarita* containing (B+Myc) or not (B-Myc) the endobacterium *Candidatus Glomeribacter gigasporarum*.

**Figure S2.** Experimental set-up summary and DEGs numbers obtained in the three analysed contrasts.

**Figure S3.** Principal Component Analysis plot of *G. margarita* transcriptome containing (B+) or not (B-) its endobacteria in mycorrhizal *L. japonicus* roots.

**Figure S4.** Real-Time PCR relative quantification of *CaGg* and *G. margarita* in the tripartite symbiosis system.

**Figure S5.** Ten top functional categories (GOs and KEGG pathways) enriched ( $p < 0.05$ ) among DEPs in *G. margarita* (B+ and B- isogenic lines) mycorrhized *Lotus japonicus* roots versus non-mycorrhized controls (NoMyc)

**Figure S6.** Plant-pathogen interaction KEGG pathway (ko04626) modulation in B-Myc (left box) and B+Myc (right box) *L. japonicus* roots versus the non mycorrhizal control (NoMyc).

**Figure S7.** Phenylpropanoid biosynthesis KEGG pathway (ko00940) modulation in B-Myc (left box) and B+Myc (right box) *L. japonicus* roots versus the non mycorrhizal control (NoMyc).

**Figure S8.** Lignin concentrations, measured using the acetyl-bromide method, in *Trifolium repens* plants mycorrhized or not with *G. margarita* containing or not *CaGg* endobacterium.

**Figure S9.** Fluoroglucinol lignin staining on longitudinal sections of *T. repens* roots colonized by *G. margarita* containing (B+Myc) or not (B-Myc) *CaGg* endobacterium.

**Figure S10.** Steroid biosynthesis KEGG pathway (ko00100) modulation in B-Myc (left box) and B+Myc (right box) *L. japonicus* roots versus the non mycorrhizal control (NoMyc).

**Figure S11.** Fatty acids biosynthesis KEGG pathway (ko00061) modulation in B-Myc (left box) and B+Myc (right box) *L. japonicus* roots versus the non mycorrhizal control (NoMyc).

### Supporting Tables

**Table S1.** RNA-seq library sizes and mapping rate on *L. japonicus* reference transcriptome.

**Table S2.** Real-Time PCR primers used in this study.

### **Supporting Data**

**Data S1.** Differentially expressed *L. japonicus* root transcripts (DEGs) in the three analysed contrasts (FDR<0.05).

**Data S2.** Differentially expressed *G. margarita* transcripts (DEGs) in mycorrhizal B+ versus B- (B+Myc vs. B-Myc) contrast (FDR<0.05).

**Data S3.** Differentially expressed *L. japonicus* root proteins (DEPs) in the three analysed contrasts (FDR<0.05).

**Data S4.** Gene Ontology (GO) and KEGG pathway functional enrichments ( $P_{\text{adj}} < 0.1$ ) of DEGs list in the B-Myc/B+Myc vs NoMyc contrasts.

**Data S5.** Gene Ontology (GO) and KEGG pathway functional enrichments ( $P_{\text{adj}} < 0.1$ ) of DEPs list in the three analysed contrasts.

## Supporting Figures

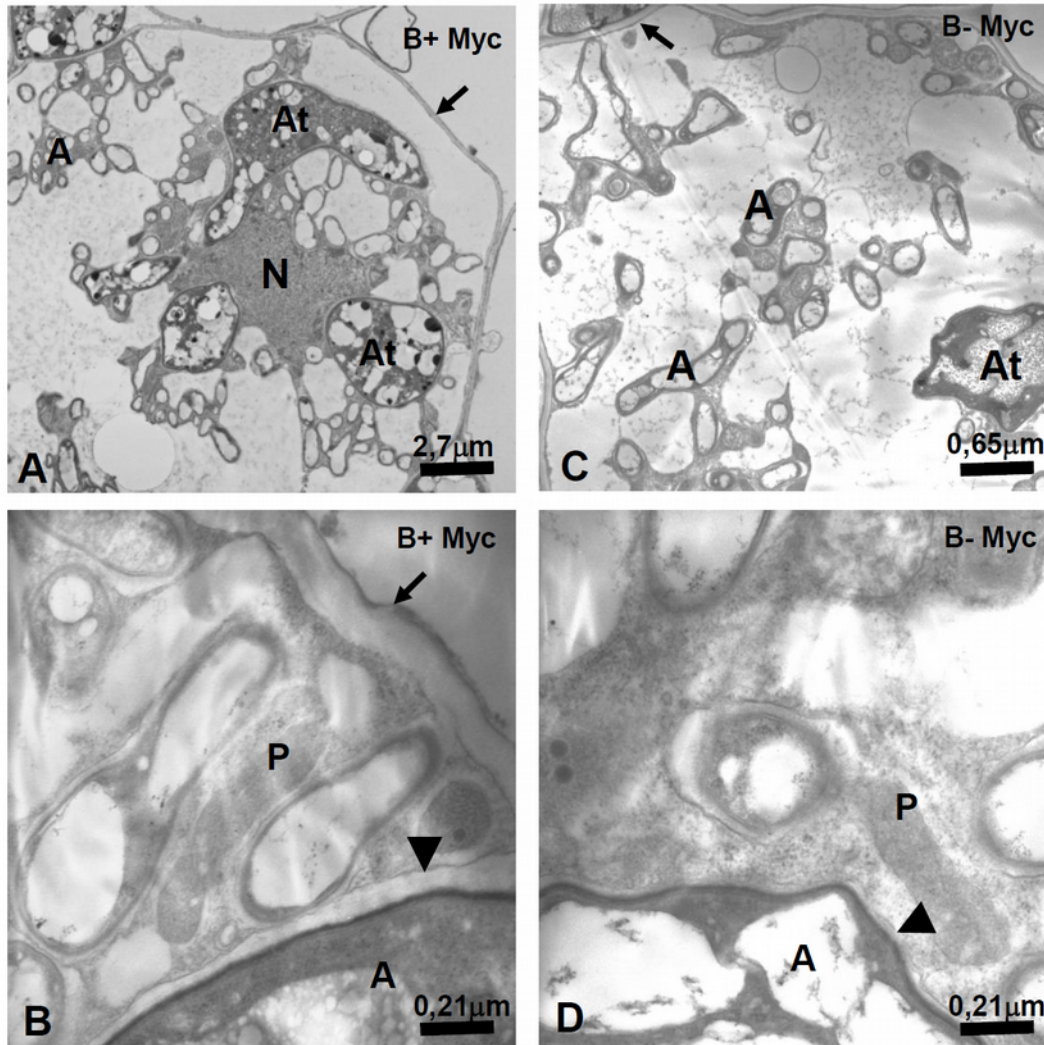

**Figure S1.** Ultrastructure of arbusculated cortical cells of *Lotus japonicus* roots when colonized by the AM fungus *Gigaspora margarita* containing (B+Myc) or not (B-Myc) the endobacterium *Candidatus Glomeribacter gigasporarum*. A and C illustrate the general organization of a root cortical cell colonized by the arbusculated fungal hyphae. (N: plant nucleus, A: finest arbuscular branches, At: arbuscule main trunks, Arrows: plant cell walls. B and D details of arbuscular branches and host plants plastids. (A: arbuscular branches, P: plastids, Arrow: plant cell wall, Arrowheads: periarbuscular membrane.

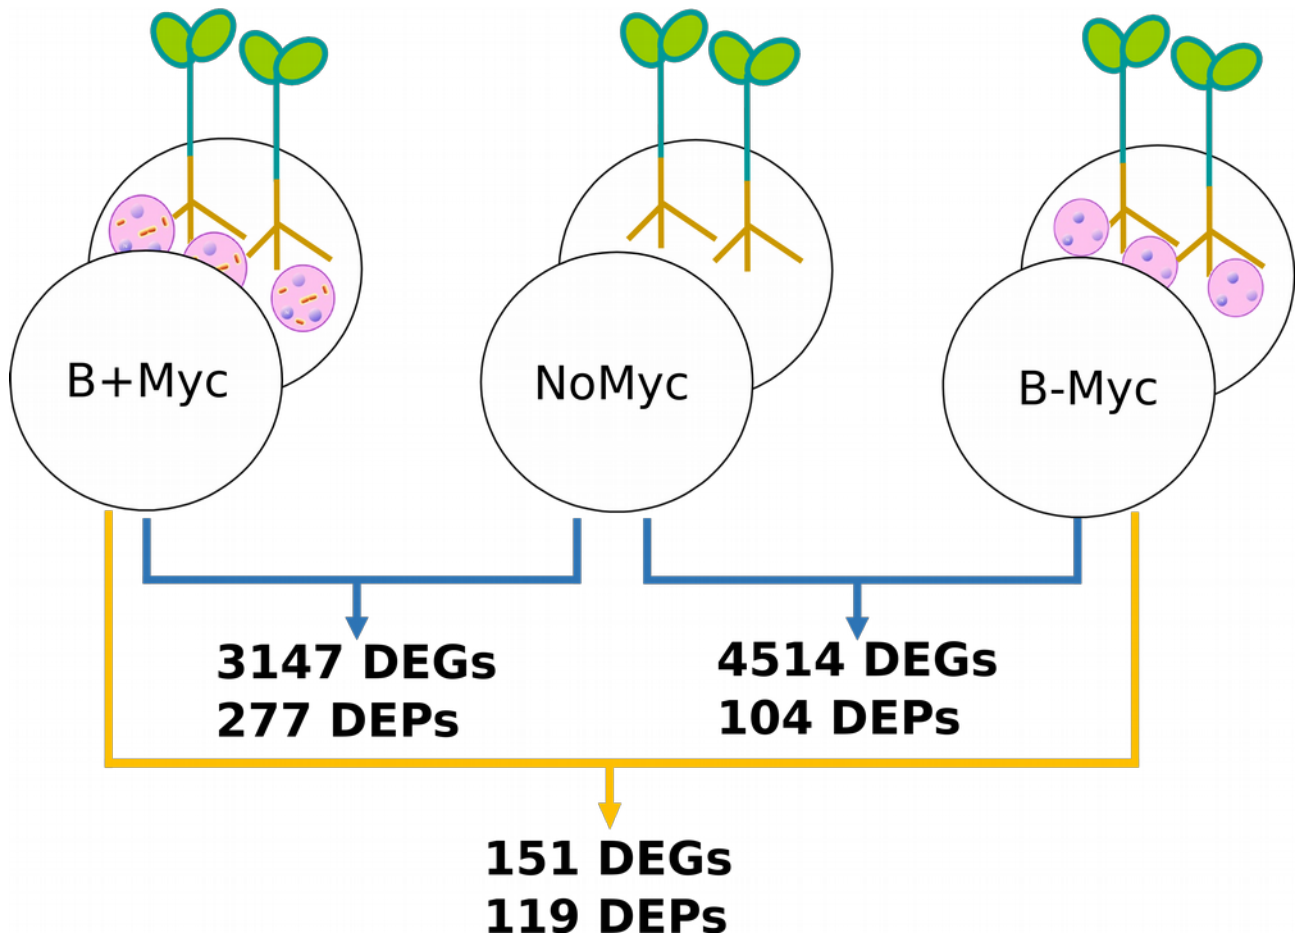

**Figure S2.** Experimental set-up summary illustrating the three growth condition for *L. japonicus* seedlings: Non-mycorrhizal (NoMyc, central position), colonized by *Gigaspora maragarita* with (B+Myc, left side) and without (B-Myc, right side) the endobacterium. The figures refers to the numbers of differentially-expressed genes (DEGs) and differentially expressed proteins (DEPs) revealed by the transcriptomic and proteomic analysis, respectively.

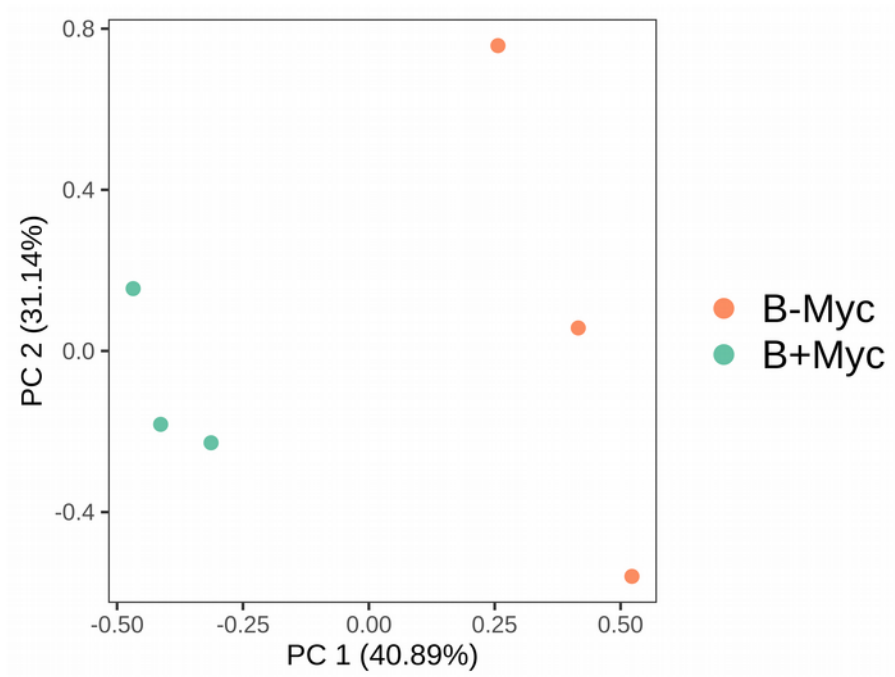

**Figure S3.** Principal Component Analysis plot of *G. margarita* transcriptome containing (B+) or not (B-) endobacteria in mycorrhizal *L. japonicus* roots. The variance explained by the first two most influential principal components (PC1 and PC12) is shown in brackets.

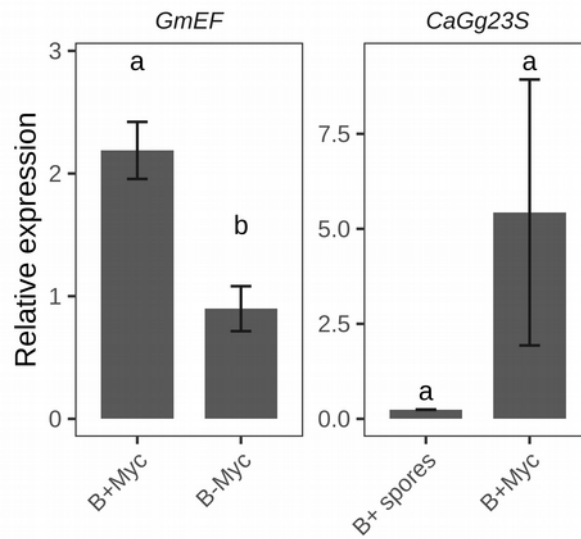

**Figure S4.** Real-Time PCR relative quantification of *CaGg* and *G. margarita* in the tripartite symbiosis system. Relative quantification has been performed normalizing the AM fungus and the *CaGg* 23S rRNA gene on the *L. japonicus* ubiquitin and the *G. margarita* elongation factor, respectively. Letters indicate statistically supported differences according to a Welch two-sample t-test ( $p < 0.05$ ).

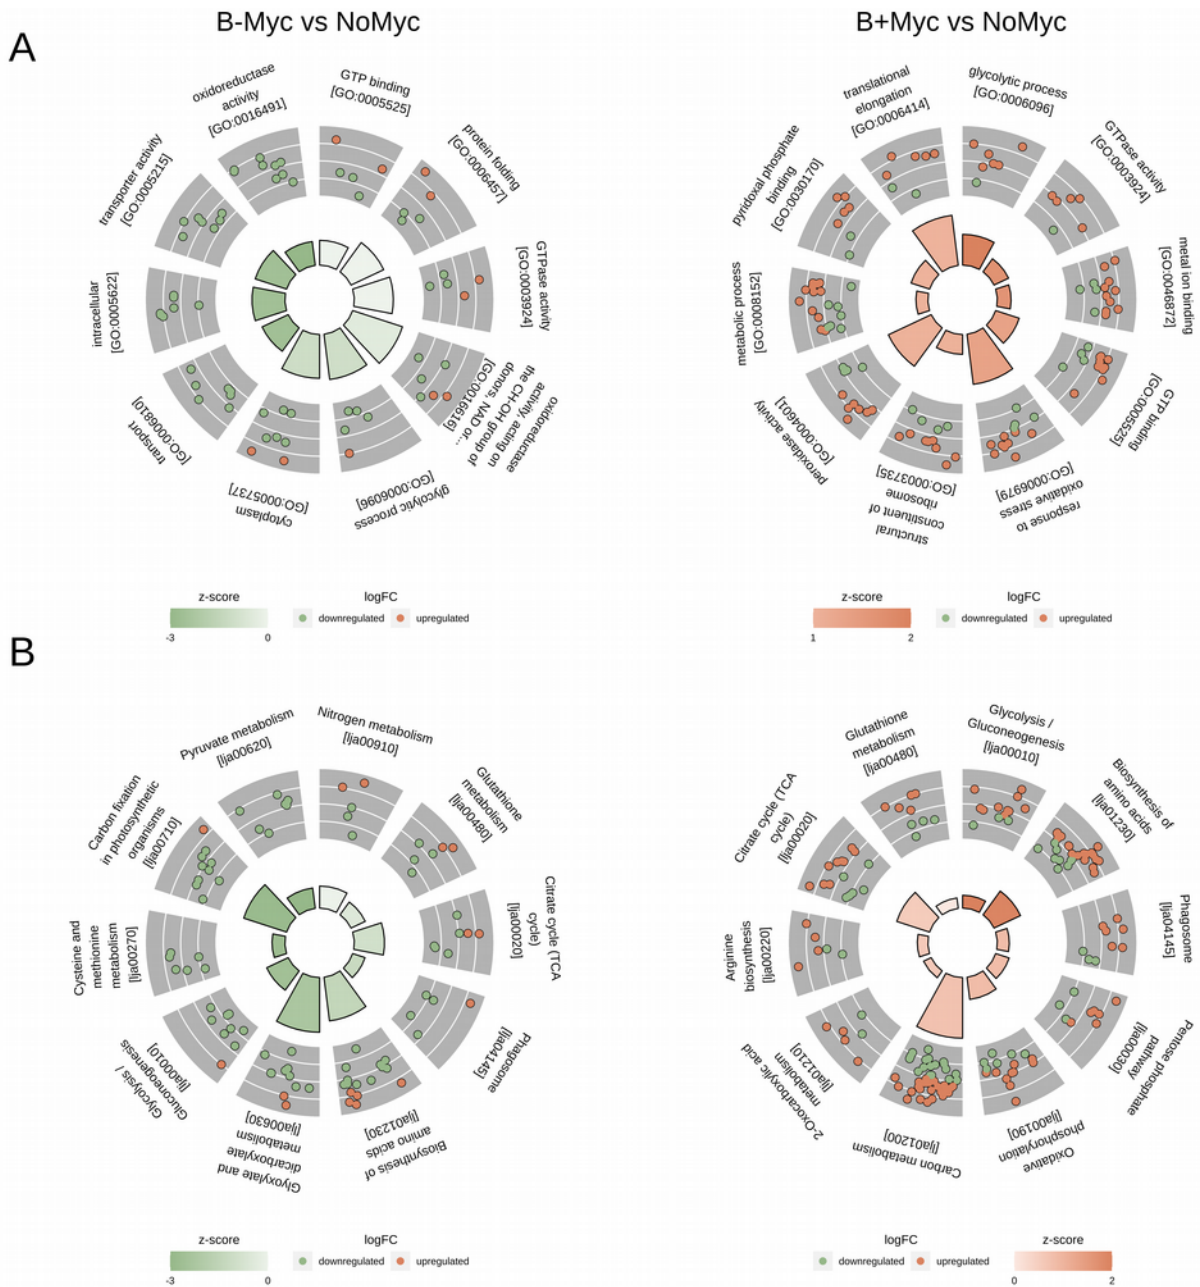

**Figure S5.** Ten top functional categories (GOs and KEGG pathways) enriched ( $p < 0.05$ ) among DEPs in *L. japonicus* roots colonized by the two isogenic lines of *G. margarita* (B+ and B-) versus the non-mycorrhizal control (NoMyc). (A) Gene-ontology (GO) functional categories; (B) KEGG pathway. Each section of the circle plot represents an enriched term or pathway. The inner barplot plots the  $-\log_{10}$  of the adjusted p-value for each enriched term and the colour shows the z-score value, indicating global up-regulation (if  $> 0$ ) or down-regulation (if  $< 0$ ) of genes within each category. Detailed  $\log_2$ fold-change value of each gene within each category is plotted as dot plot in the outer circle (up-regulated in red and down-regulated in green). The first ten enriched categories were plotted clockwise by decreasing z-score and p-value.

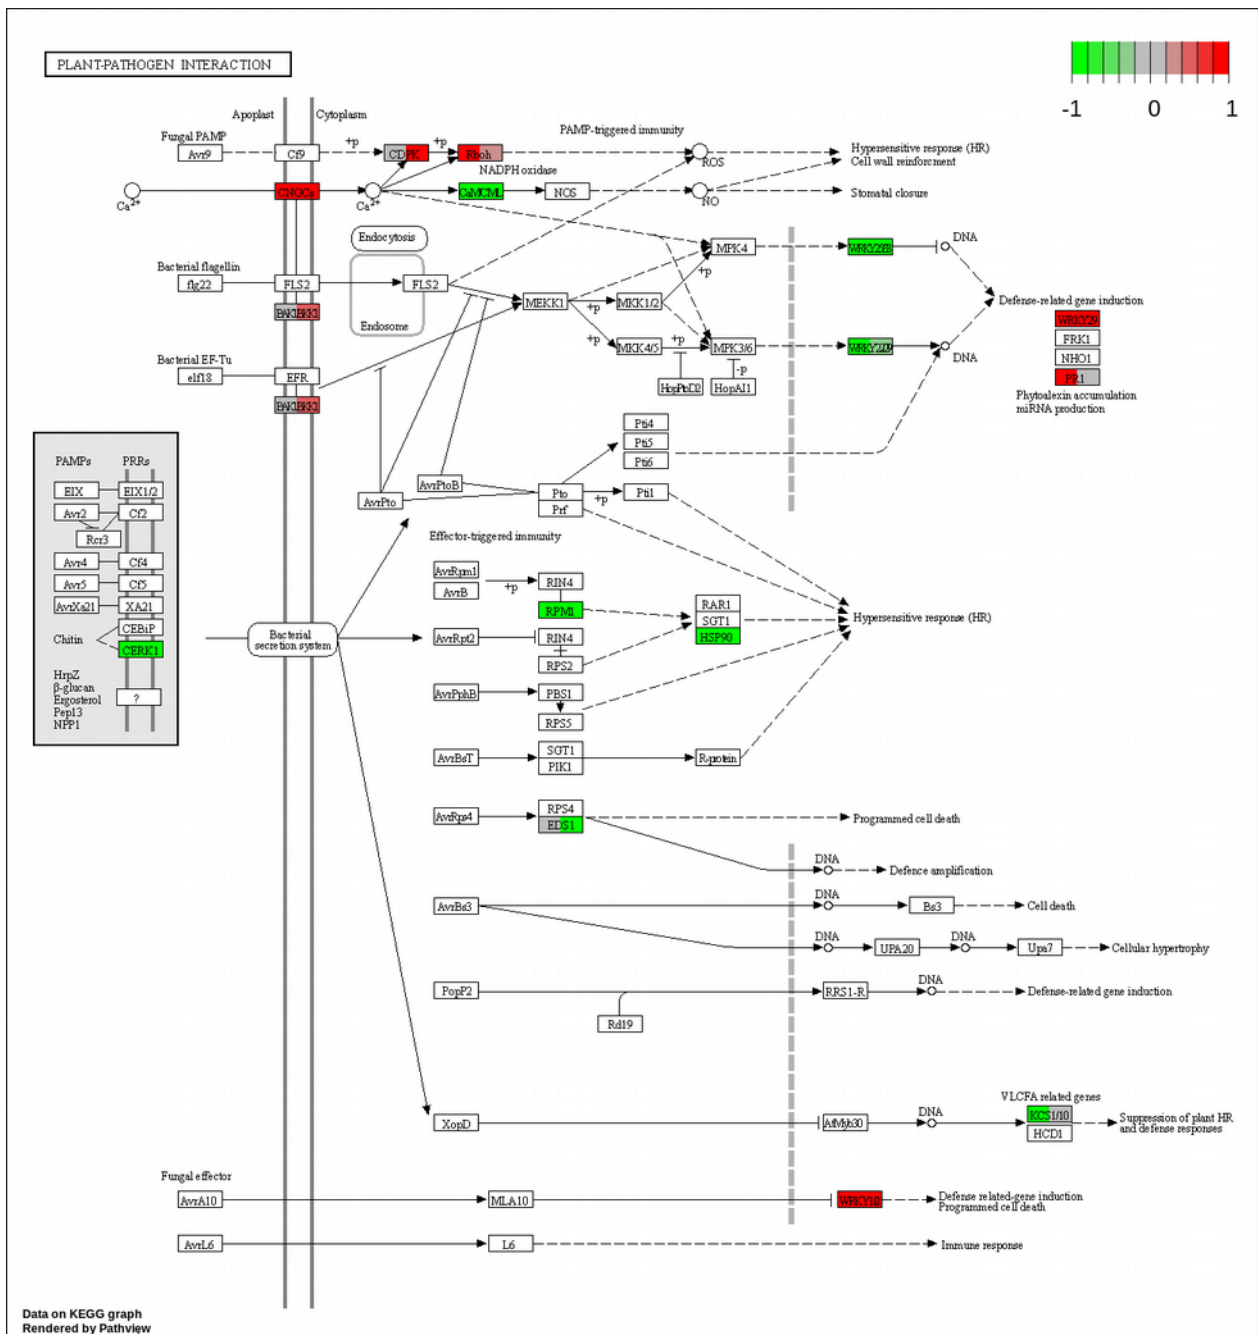

**Figure S6.** Plant–pathogen interaction KEGG pathway (ko04626) modulation in B-Myc versus NoMyc (left box) and B+Myc versus NoMyc (right box) *L. japonicus* roots. Up-regulated IDs are displayed in red, down-regulated ones in green.



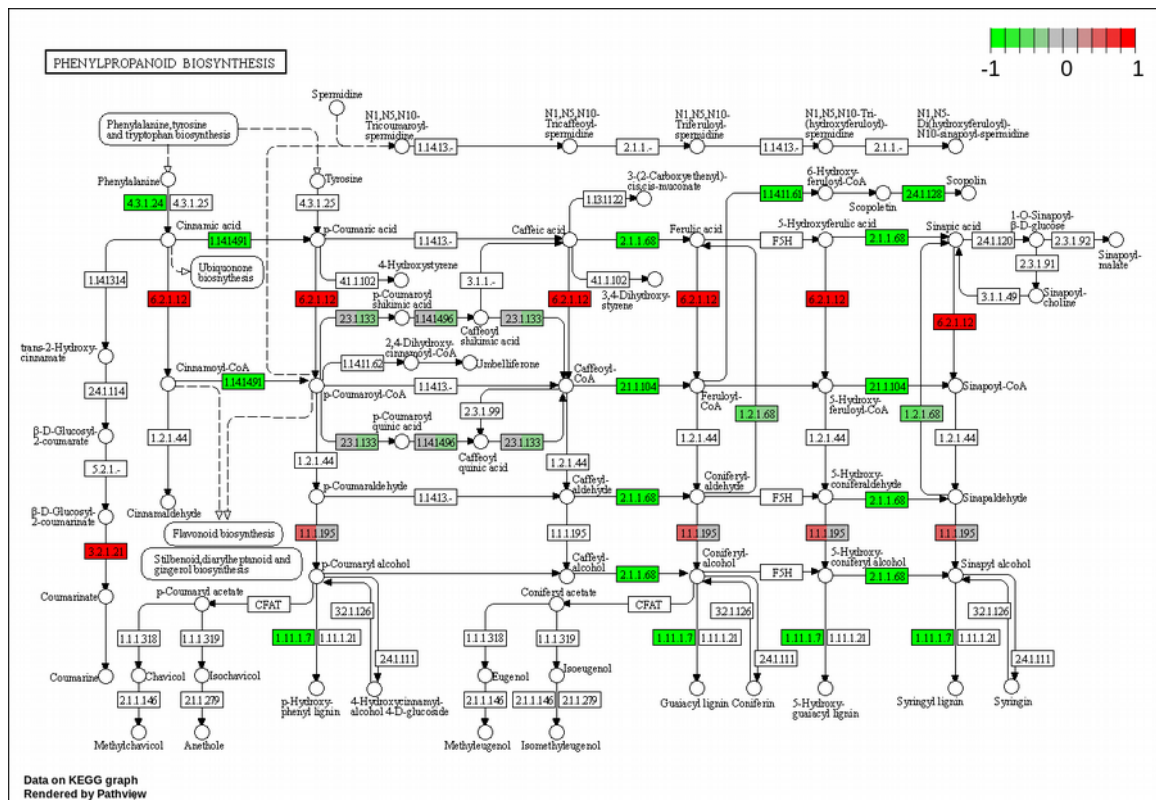

**Figure S7.** Phenylpropanoid biosynthesis KEGG pathway (ko00940) modulation in B-Myc versus NoMyc (left box) and B+Myc versus NoMyc (right box) *L. japonicus* roots. Up-regulated IDs are displayed in red, down-regulated ones in green.

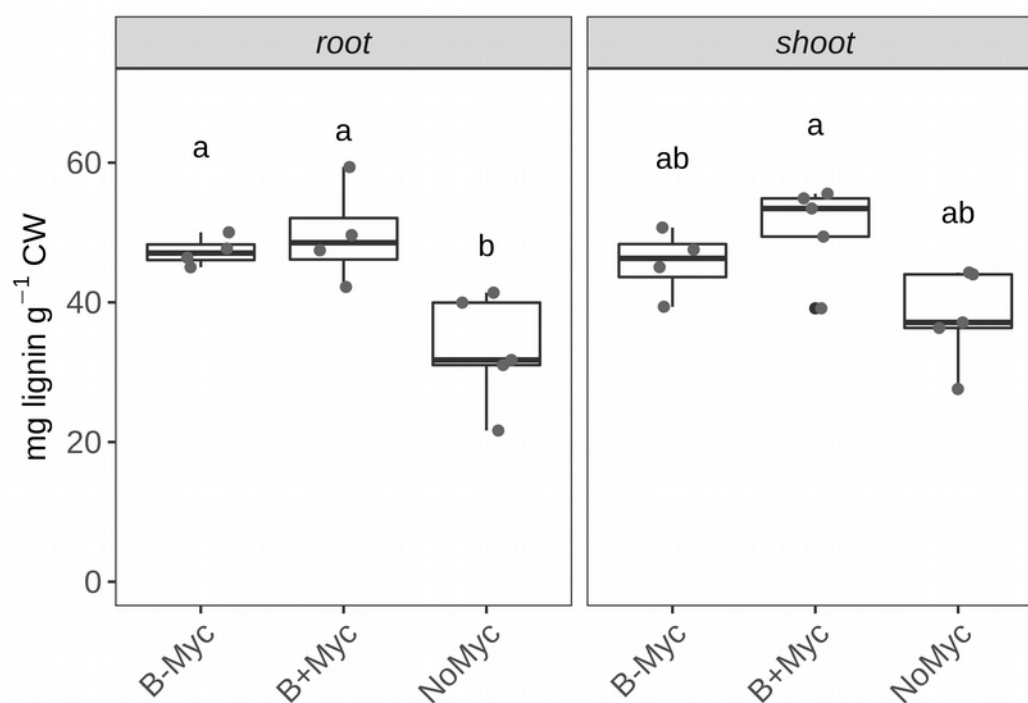

**Figure S8.** Lignin concentration, measured using the acetyl-bromide method, in *Trifolium repens* plants mycorrhized or not with *G. margarita* containing or not *CaGg* endobacterium. Letters indicate significant differences among treatments (ANOVA, Tukey's post hoc test;  $P < 0.05$ ). Lignin amount is expressed as mg per gram of purified cell wall (CW) material;  $n = 5$ , boxplots display the median (horizontal line), the quartiles (boxes) and 1.5 interquartile range (whiskers).

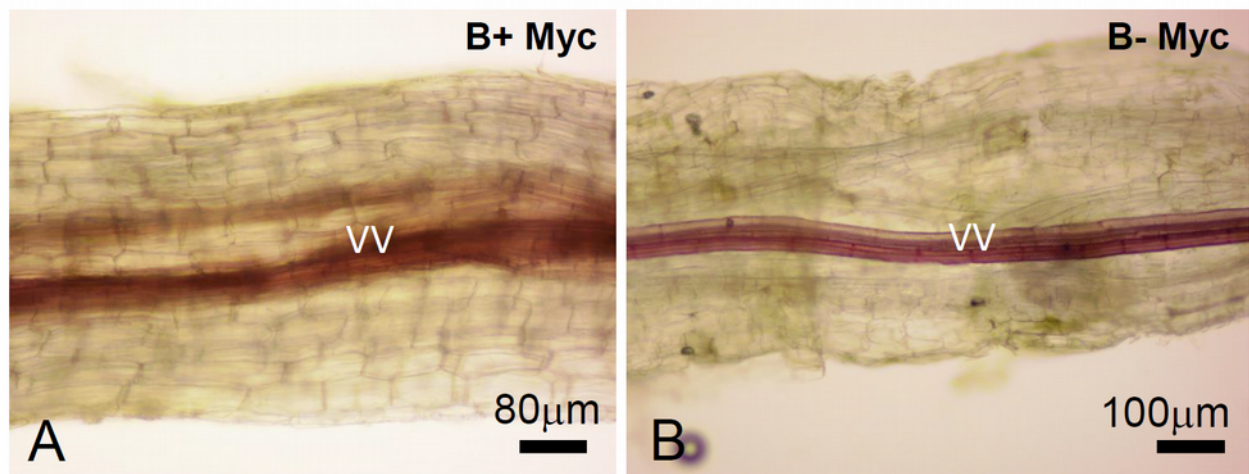

**Figure S9.** Fluoroglucinol lignin staining on longitudinal sections of *T. repens* roots colonized by *G. margarita* containing (B+Myc) or not (B-Myc) *CaGg* endobacterium. A and B overview of the colonized roots (VV: vascular vessels).

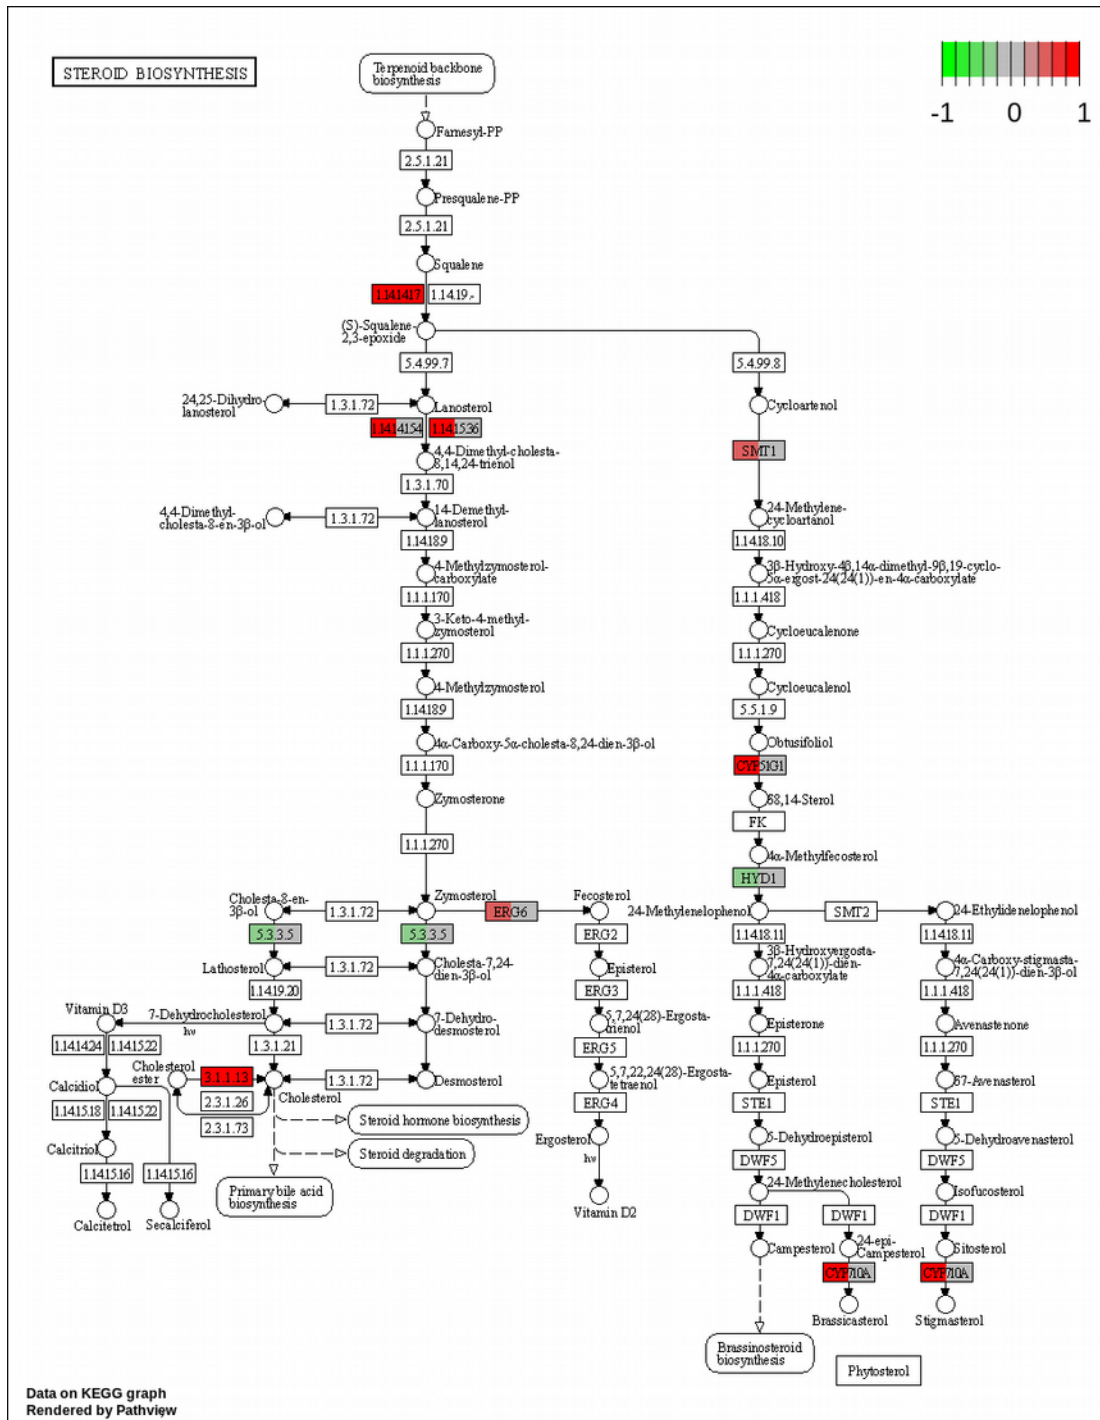

**Figure S10.** Steroid biosynthesis KEGG pathway (ko00100) modulation in in B-Myc versus NoMyc (left box) and B+Myc versus NoMyc (right box) *L. japonicus* roots. Up-regulated IDs are displayed in red, down-regulated ones in green.

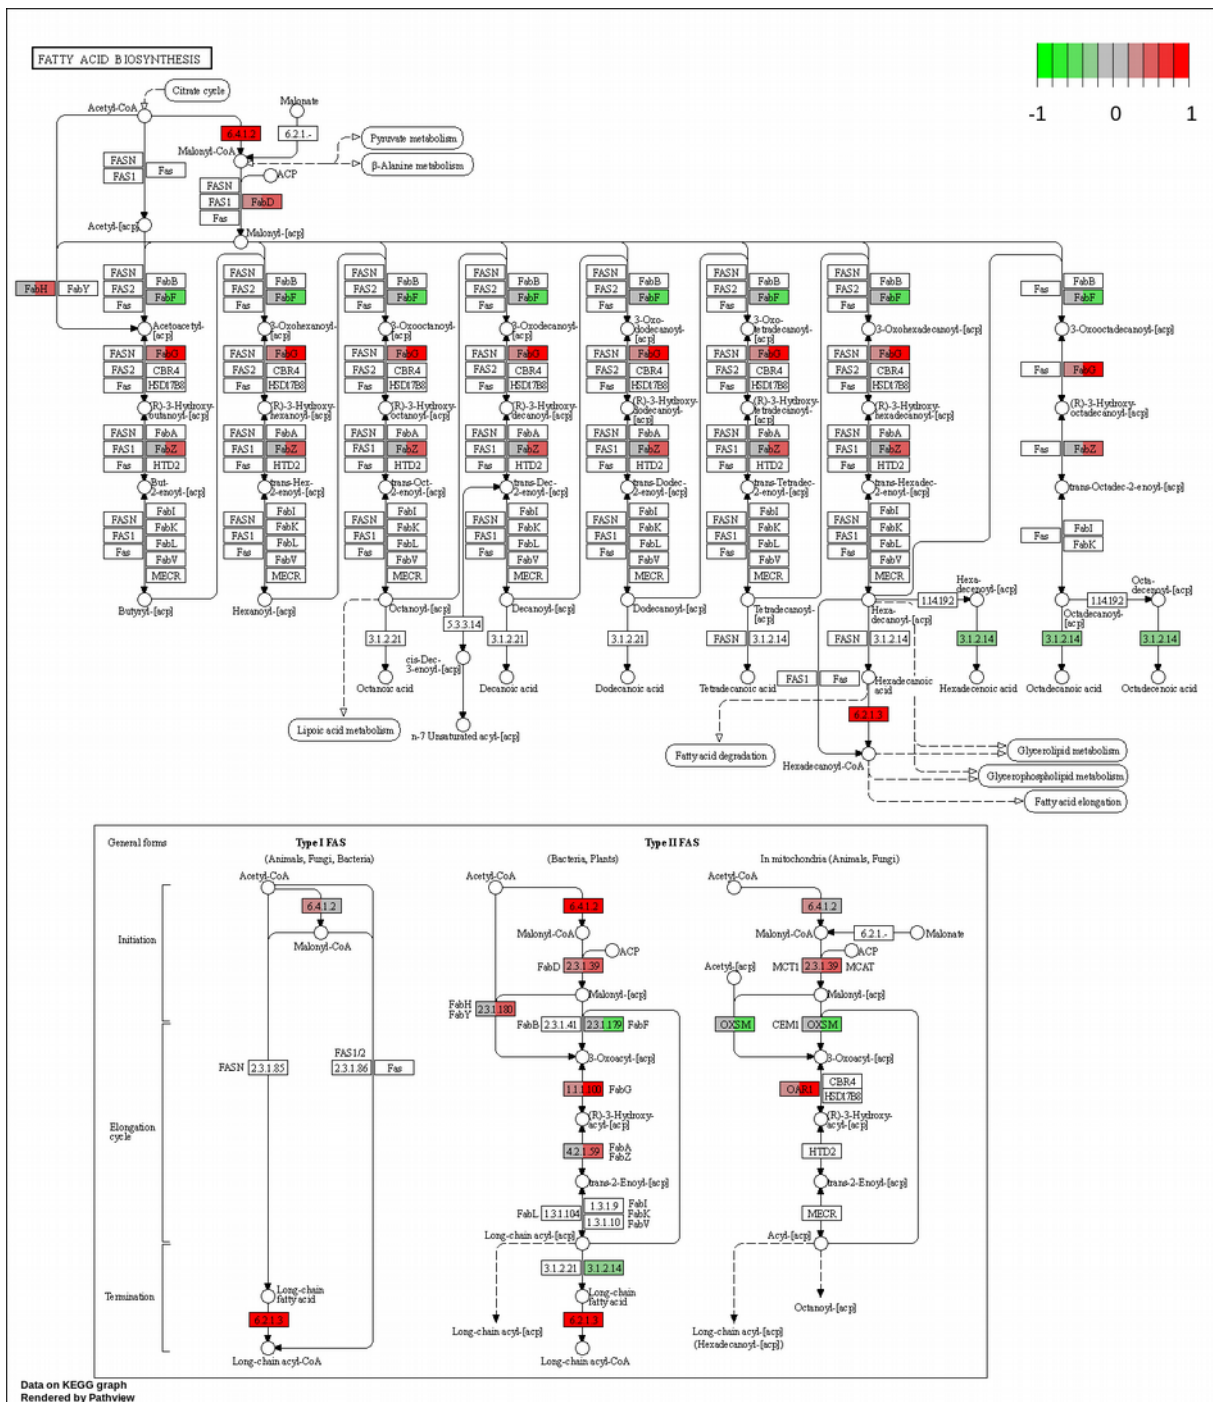

**Figure S11.** Fatty acids biosynthesis KEGG pathway (ko00061) modulation in B-Myc versus NoMyc (left box) and B+Myc versus NoMyc (right box) *L. japonicus* roots. Up-regulated IDs are displayed in red, down-regulated ones in green.

### Supporting Tables

| <b>Library</b> | <b>N. of reads pairs</b> | <b>Mapping rate on <i>L. japonicus</i> v.3 transcriptome</b> |
|----------------|--------------------------|--------------------------------------------------------------|
| NoMyc3         | 68.404.818               | 74.87%                                                       |
| NoMyc4         | 62.219.029               | 73.38%                                                       |
| NoMyc7         | 58.509.848               | 73.40%                                                       |
| B+Myc1         | 57.932.634               | 64.94%                                                       |
| B+Myc5         | 53.826.962               | 72.82%                                                       |
| B+Myc7         | 56.652.196               | 70.95%                                                       |
| B-Myc4         | 61.271.154               | 70.50%                                                       |
| B-Myc5         | 57.444.085               | 70.86%                                                       |
| B-Myc7         | 95.349.977               | 68.43%                                                       |

**Table S1.** RNA-seq library sizes and mapping rate on *L. japonicus* reference transcriptome.

**Table S2.** Oligonucleotides sequences used in this study

| Organism                              | Gene           | Annotation                                      | Transcript ID       | Forward primer (5' -3' ) | Revers primer (5' -3' )   | Reference             |
|---------------------------------------|----------------|-------------------------------------------------|---------------------|--------------------------|---------------------------|-----------------------|
| <i>Lotus japonicus</i>                | <i>LjUBI</i>   | Ubiquitin-10                                    | Lj5g3v2060710.1     | TTCACCTTGTGCTCCGTCTTC    | AACAACAGCACACACAGACAATCC  | Guether et al., 2009  |
|                                       | <i>LjPT4</i>   | AM-induced phosphate transporter 4              | Lj1g3v0948470.1     | GTACAATGACCTCATGGTTCT    | CGTTCATCTCGAAATCCTTATC    | Volpe et al., 2013    |
| <i>G. margarita</i>                   | <i>EF1a</i>    | Elongation factor 1-alpha                       | AJ566401            | TGAACCTCCAACCAGACCAACTG  | CGGTTTCAACACGACCTACAGGGAC | Salvioli et al., 2008 |
|                                       | <i>GmPHO1</i>  | Xenotropic and polytropic retrovirus receptor 1 | g17792.t1           | CGCATTGGATACACCCACCT     | CCTTCCTCAGGGCTCGATTG      | This study            |
| <i>Ca. Glomeribacter gigasporarum</i> | <i>CaGg23S</i> | 23S rRNA gene                                   | AJ561042.3          | GGGTCCATTGCGGATTACTTC    | GTTGTTGCCCTCTTGACACC      | Salvioli et al., 2008 |
|                                       | <i>CaGgPT</i>  | Phosphate import ATP-binding protein PstB       | CAGGBEG34_v5_100026 | CCGTTTCCGATGTCGGTGTA     | ACGCAGTGTGTTCTTCACCT      | This study            |
